# Supplementary material for: Piceatannol Upregulates SIRT1 Expression in Skeletal Muscle Cells and in Human Whole Blood: In Vitro Assay and a Randomized, Double-Blind, Placebo-Controlled, Parallel-Group Comparison Trial
Source: MDPI journal article supplement (doi:10.3390/life14050589), 2024-05-05
Supplement: s1 [file s1]

## Supplementary Table

**Table S1. Subgroup analysis of *SIRT1* expression by age.**

|         |               | age    | 0 week |       | 1 week |       | <u>p-value</u> | 2 week |       | <u>p-value</u> |
|---------|---------------|--------|--------|-------|--------|-------|----------------|--------|-------|----------------|
|         |               |        | AVE    | SE    | AVE    | SE    |                | AVE    | SE    |                |
| Placebo | <i>n</i> = 28 | 20-29y | 0.943  | 0.046 | 0.971  | 0.043 | 0.960          | 0.922  | 0.041 | 0.460          |
| PIC     | <i>n</i> = 29 |        | 0.966  | 0.044 | 0.990  | 0.052 |                | 0.902  | 0.044 |                |
| Placebo | <i>n</i> = 27 | 30-39y | 1.036  | 0.053 | 0.961  | 0.043 | 0.074          | 0.947  | 0.046 | 0.730          |
| PIC     | <i>n</i> = 28 |        | 0.933  | 0.035 | 0.944  | 0.039 |                | 0.905  | 0.040 |                |
| Placebo | <i>n</i> = 31 | 40-49y | 0.972  | 0.037 | 0.996  | 0.043 | 0.690          | 0.971  | 0.037 | 0.500          |
| PIC     | <i>n</i> = 24 |        | 0.971  | 0.046 | 1.017  | 0.051 |                | 0.947  | 0.034 |                |
| Placebo | <i>n</i> = 33 | 50-59y | 1.057  | 0.039 | 1.065  | 0.036 | 0.505          | 1.033  | 0.041 | 0.588          |
| PIC     | <i>n</i> = 29 |        | 0.954  | 0.036 | 1.027  | 0.042 |                | 0.982  | 0.037 |                |
| Placebo | <i>n</i> = 24 | 60-69y | 0.920  | 0.031 | 0.854  | 0.036 | 0.008          | 0.846  | 0.035 | 0.004          |
| PIC     | <i>n</i> = 28 |        | 0.985  | 0.037 | 1.007  | 0.037 |                | 1.020  | 0.044 |                |

**Table S2. Subgroup analysis of *SIRT1* expression according to body mass index (BMI).**

|         |               | BMI                       | 0 week |       | 1 week |       | <i>p</i> -value | 2 week |       | <i>p</i> -value |
|---------|---------------|---------------------------|--------|-------|--------|-------|-----------------|--------|-------|-----------------|
|         |               |                           | AVE    | SE    | AVE    | SE    |                 | AVE    | SE    |                 |
| Placebo | <i>n</i> = 52 | $20 \leq \text{BMI} < 25$ | 1.000  | 0.034 | 1.014  | 0.036 | 0.290           | 0.975  | 0.033 | 0.241           |
| PIC     | <i>n</i> = 47 |                           | 0.970  | 0.029 | 1.025  | 0.033 |                 | 0.996  | 0.034 |                 |
| Placebo | <i>n</i> = 47 | $25 \leq \text{BMI} < 30$ | 0.997  | 0.030 | 1.000  | 0.030 | 0.356           | 0.977  | 0.030 | 0.429           |
| PIC     | <i>n</i> = 48 |                           | 1.000  | 0.029 | 1.029  | 0.030 |                 | 0.951  | 0.029 |                 |
| Placebo | <i>n</i> = 44 | $30 \leq \text{BMI}$      | 0.968  | 0.034 | 0.909  | 0.028 | 0.039           | 0.892  | 0.030 | 0.055           |
| PIC     | <i>n</i> = 43 |                           | 0.910  | 0.033 | 0.931  | 0.038 |                 | 0.902  | 0.030 |                 |

**Table S3. Subgroup analysis of *SIRT1* expression by sex and body mass index (BMI).**

|         |               | sex and BMI             | 0 week |       | 1 week |       | <i>p</i> -value | 2 week |       | <i>p</i> -value |
|---------|---------------|-------------------------|--------|-------|--------|-------|-----------------|--------|-------|-----------------|
|         |               |                         | AVE    | SE    | AVE    | SE    |                 | AVE    | SE    |                 |
| Placebo | <i>n</i> = 72 | Men                     | 0.993  | 0.026 | 0.994  | 0.026 | 0.358           | 0.961  | 0.024 | 0.585           |
| PIC     | <i>n</i> = 69 |                         | 0.971  | 0.024 | 1.008  | 0.027 |                 | 0.962  | 0.024 |                 |
| Placebo | <i>n</i> = 71 | Women                   | 0.985  | 0.028 | 0.959  | 0.027 | 0.018           | 0.939  | 0.028 | 0.351           |
| PIC     | <i>n</i> = 69 |                         | 0.953  | 0.025 | 0.986  | 0.029 |                 | 0.940  | 0.028 |                 |
| Placebo | <i>n</i> = 25 | Men,<br>20 ≤ BMI < 25   | 0.947  | 0.043 | 1.014  | 0.059 | 0.949           | 0.951  | 0.042 | 0.603           |
| PIC     | <i>n</i> = 23 |                         | 0.965  | 0.046 | 1.025  | 0.047 |                 | 0.988  | 0.045 |                 |
| Placebo | <i>n</i> = 25 | Men,<br>25 ≤ BMI < 30   | 1.013  | 0.044 | 1.016  | 0.038 | 0.876           | 0.995  | 0.043 | 0.602           |
| PIC     | <i>n</i> = 24 |                         | 1.012  | 0.038 | 1.010  | 0.042 |                 | 0.969  | 0.041 |                 |
| Placebo | <i>n</i> = 22 | Men,<br>30 ≤ BMI        | 1.022  | 0.046 | 0.947  | 0.034 | 0.028           | 0.933  | 0.040 | 0.151           |
| PIC     | <i>n</i> = 22 |                         | 0.933  | 0.042 | 0.987  | 0.052 |                 | 0.929  | 0.038 |                 |
| Placebo | <i>n</i> = 27 | Women,<br>20 ≤ BMI < 25 | 1.049  | 0.051 | 1.013  | 0.045 | 0.045           | 0.998  | 0.051 | 0.193           |
| PIC     | <i>n</i> = 24 |                         | 0.975  | 0.038 | 1.024  | 0.046 |                 | 1.004  | 0.052 |                 |
| Placebo | <i>n</i> = 22 | Women,<br>25 ≤ BMI < 30 | 0.978  | 0.041 | 0.981  | 0.048 | 0.162           | 0.955  | 0.043 | 0.583           |
| PIC     | <i>n</i> = 24 |                         | 0.988  | 0.044 | 1.048  | 0.044 |                 | 0.933  | 0.043 |                 |
| Placebo | <i>n</i> = 22 | Women,<br>30 ≤ BMI      | 0.914  | 0.049 | 0.870  | 0.043 | 0.523           | 0.850  | 0.046 | 0.261           |
| PIC     | <i>n</i> = 21 |                         | 0.886  | 0.050 | 0.876  | 0.054 |                 | 0.874  | 0.048 |                 |

**Table S4. Subgroup analysis of *SIRT1* expression by menopausal status in female.**

|         |               |                | 0 week |       | 1 week |       | <i>p</i> -value | 2 week |       | <i>p</i> -value |
|---------|---------------|----------------|--------|-------|--------|-------|-----------------|--------|-------|-----------------|
|         |               |                | AVE    | SE    | AVE    | SE    |                 | AVE    | SE    |                 |
| Placebo | <i>n</i> = 46 | premenopausal  | 0.979  | 0.038 | 0.970  | 0.036 | 0.338           | 0.952  | 0.038 | 0.366           |
| PIC     | <i>n</i> = 45 |                | 0.904  | 0.030 | 0.933  | 0.035 |                 | 0.870  | 0.029 |                 |
| Placebo | <i>n</i> = 25 | postmenopausal | 0.997  | 0.038 | 0.939  | 0.039 | 0.008           | 0.914  | 0.040 | 0.006           |
| PIC     | <i>n</i> = 24 |                | 1.043  | 0.042 | 1.079  | 0.045 |                 | 1.071  | 0.050 |                 |
